# Supplementary material
Source: PubMed Central journal article supplement (PMC3294797)
Supplement: supp_194.5.1136_TableS1-S2_FigS1-S3.pdf [file supp_194.5.1136_TableS1-S2_FigS1-S3.pdf]

## SUPPLEMENTAL INFORMATION

Belonging to the manuscript:

**Functional analysis of the N-acetylglucosamine metabolic genes of *Streptomyces coelicolor* and role in the control of development and antibiotic production**

by Magdalena A. Świątek, Elodie Tenconi, Sébastien Rigali and Gilles P. van Wezel

**Table S1. Plasmids used and constructed in this study.**

| <b>Plasmid</b> | <b>Description</b>                                                                                                                                                         | <b>Reference</b> |
|----------------|----------------------------------------------------------------------------------------------------------------------------------------------------------------------------|------------------|
| pWHM3          | Cloning vector, <i>colE1</i> replicon, pSG5 replicon, TsrR, AmpR                                                                                                           | (3)              |
| pHJL401        | Complementation vector, SCP2*, pUC19 replicon, TsrR, AmpR                                                                                                                  | (2)              |
| pUWLcre        | pUWLorT derivative with <i>cre(a)</i> gene under <i>ermE*</i> promoter                                                                                                     | (1)              |
| pGAM1          | pWHM3 containing flanking regions of <i>S. coelicolor</i> SCO4284 with apraloxP_ <i>Xba</i> I inserted between them in pWHM3 <i>Eco</i> RI- <i>Hind</i> III                | This work        |
| pGAM2          | pWHM3 containing flanking regions of <i>S. coelicolor</i> SCO5236 with apraloxP_ <i>Xba</i> I inserted between them in pWHM3 <i>Eco</i> RI- <i>Hind</i> III                | This work        |
| pGAM3          | pWHM3 containing flanking regions of <i>S. coelicolor</i> SCO4285 with apraloxP_ <i>Xba</i> I inserted between them in pWHM3 <i>Eco</i> RI- <i>Hind</i> III                | This work        |
| pGAM4          | pWHM3 containing flanking regions of <i>S. coelicolor</i> SCO4284-SCO4285 operon with apraloxP_ <i>Xba</i> I inserted between them in pWHM3 <i>Eco</i> RI- <i>Hind</i> III | This work        |
| pGAM5          | pHJL401 containing <i>nagKA</i> gene with its promoter                                                                                                                     | This work        |
| pGAM6          | pHJL401 containing <i>nagB</i> genes with its promoter                                                                                                                     | This work        |

**Table S2. Oligos used in this study.** Restriction sites used for cloning are in bold and underlined. GAATTC, *EcoRI*; TCTAGA, *XbaI*; AAGCTT, *HindIII*;

| Name                     | 5'-3' Sequence                                                                                | Purpose and restriction sites |
|--------------------------|-----------------------------------------------------------------------------------------------|-------------------------------|
| nagA_LF-1365             | GTCAG <b><u>GAATTC</u></b> ACGTCGTTCCAGGAGTAGACGGTG                                           | Cloning, <i>EcoRI</i>         |
| nagA_LR+6                | GTCAT <b><u>TCTAGA</u></b> AGGCCATCAGGTGGTTACC                                                | Cloning, <i>XbaI</i>          |
| nagA_RF+1133             | GTCAT <b><u>TCTAGA</u></b> CACCTGGGCTGATCCGGCTCC                                              | Cloning, <i>XbaI</i>          |
| nagA_RR+2484             | GTCAA <b><u>AAGCTT</u></b> TGAACGTGCGCTACGGCATCC                                              | Cloning, <i>HindIII</i>       |
| nagB_LF-1185             | GTCAG <b><u>GAATTC</u></b> AAGAGCGACCGCTTGTCCGCGAA                                            | Cloning, <i>EcoRI</i>         |
| nagB_LF+6                | GTCAT <b><u>TCTAGA</u></b> ATCCACGCTGGCCTGCCGTTT                                              | Cloning, <i>XbaI</i>          |
| nagB_RF+770              | GTCAT <b><u>TCTAGA</u></b> TGGCAGGGCATCTGAGCTGTC                                              | Cloning, <i>XbaI</i>          |
| nagB_RR+1918             | GTCAA <b><u>AAGCTT</u></b> TGTGATGAGCGCCACATCCTGG                                             | Cloning, <i>HindIII</i>       |
| nagK_LF-1450             | GTCAG <b><u>GAATTC</u></b> CATGTACGGCACCGTAACGCCCA                                            | Cloning, <i>EcoRI</i>         |
| nagK_LR+6                | GTCAT <b><u>TCTAGA</u></b> CTTCATCCCGGTGCCGCCACATC                                            | Cloning, <i>XbaI</i>          |
| nagK_RF+963              | GTCAT <b><u>TCTAGA</u></b> GAGGTAACCACCTGATGGCCCAAG                                           | Cloning, <i>XbaI</i>          |
| nagK_RR+2570             | GTAC <b><u>AAGCTT</u></b> CTCGTTGAGCTGGGTGGTGTCC                                              | Cloning, <i>HindIII</i>       |
| APRA_loxL                | CTAGG <b><u>TCTAGA</u></b> GGTGTGATAACTTCGTATAGCATAC<br>ATTATACGAAGTTATACTTATGAGCTCAGCCAATCG  | Cloning, <i>XbaI</i>          |
| APRA_loxR                | CTAGG <b><u>TCTAGA</u></b> GATGCGGATAACTTCGTATAATGTAT<br>GCTATACGAAGTTATCCCCGAAGCAGGGTTATGCAG | Cloning, <i>XbaI</i>          |
| 5236compl-454            | GTCAG <b><u>GAATTC</u></b> GCACGGCGGTGATGCCGGACAAC                                            | Cloning, <i>EcoRI</i>         |
| 5236compl+773(796)       | GTCAA <b><u>AAGCTT</u></b> GCGGGACAGCTCAGATGCCCTGC                                            | Cloning, <i>HindIII</i>       |
| SCO4285-84compl-512      | GTCAG <b><u>GAATTC</u></b> ACCGGGATGGAGAGCACGTCGTC                                            | Cloning, <i>EcoRI</i>         |
| SCO4285-84compl+2240(62) | GTCAA <b><u>AAGCTT</u></b> ACGGTGAGGATCACCGTGCCGA                                             | Cloning, <i>HindIII</i>       |
| nagA_FOR-198             | TCACCTTCCAGAAACTGCCGGAG                                                                       | PCR confirmation, sequencing  |
| nagA_REV+1417            | AGCCGGTGACCGTGACCTCGTGG                                                                       | PCR confirmation, sequencing  |
| nagB_FOR-336             | CGCCCGGCATCATCGACACGGAC                                                                       | PCR confirmation              |
| nagB_REV+1098            | TCGCGGGCGTCTGACGATCACC                                                                        | PCR confirmation              |
| nagK_FOR-208             | AGGACCGCCGTCATGCCAGTG                                                                         | PCR confirmation              |
| nagK_REV+1310            | ACGATGTCGCCCTGCTGCCGAC                                                                        | PCR confirmation              |
| SCO4285for_seq           | GTCAG <b><u>GAATTC</u></b> AGTGCGGACACCACCGGATCG                                              | Sequencing, <i>EcoRI</i>      |
| SCO4285rev_seq           | GTCAA <b><u>AAGCTT</u></b> AGAACCTTGCTTGGGGCCATCAG                                            | Sequencing, <i>HindIII</i>    |
| 2907for_seq              | GTCAG <b><u>GAATTC</u></b> GCGCCTGTGATCAGGGGACTTGG                                            | Sequencing, <i>EcoRI</i>      |
| 2907rev_seq              | GTCAA <b><u>AAGCTT</u></b> TGTACGAGATCTGAGCCCGCGAC                                            | Sequencing, <i>HindIII</i>    |
| 2905for_seq              | GTCAG <b><u>GAATTC</u></b> TGACCGCGCTGTCGGCACTC                                               | Sequencing, <i>EcoRI</i>      |

|                                       |                                                             |                               |
|---------------------------------------|-------------------------------------------------------------|-------------------------------|
| 2905rev_seq                           | GTCAG <b><u>GAATTC</u></b> TGACCGCGCTGTCGGCACTC             | Sequencing,<br><i>HindIII</i> |
| 2906for_seq                           | GTCAG <b><u>GAATTC</u></b> AGTCGGGTGATGCAGCCTTCG            | Sequencing,<br><i>EcoRI</i>   |
| 2906rev_seq                           | GTCA <b><u>AAGCTT</u></b> TCGCGAGACCACTCCCAAAGG             | Sequencing,<br><i>HindIII</i> |
| 4284RTfor                             | ACATCGTTGGCATCCACTTC                                        | RT-PCR                        |
| 4284RTrev                             | CGCCAGCGTCATCATCTT                                          | RT-PCR                        |
| 4285RTfor                             | CGTCACCTTCCAGAACTGC                                         | RT-PCR                        |
| 4285RTrev                             | CTGTGGAAGACGGAGCAGA                                         | RT-PCR                        |
| rpsIRTfor                             | GTAGCGGTTGTCCAGCTCGAGCA                                     | RT-PCR                        |
| rpsIRTrev                             | GAGACCACTCCCGAGCAGCCGC                                      | RT-PCR                        |
| 5236_RT1                              | CGACTCGCGGTGCTCGGCGGG                                       | RT-PCR                        |
| 5236_RT2                              | GATGCCAAGGCGGGCGGCGAAC                                      | RT-PCR                        |
| <i>dredasA</i>                        | CAAGCTCCCCGTA <b><u>CTGGTCTACACCATTGGTCCAGGTC</u></b><br>CC | EMSA                          |
| <i>drenagB</i>                        | CCGCTCTGTTAGATTGGTCTAAACCACATAGCCAGTCC<br>CGG               | EMSA                          |
| <i>drenagKA</i>                       | CGTACACCCGGGAGAGGTCTAGTCCACTGCGGTGGTG<br>TAG                | EMSA                          |
| <i>blaI cis-acting</i><br>element OP1 | GAAAGTATTACATATGTAAGATTTAAATGC                              | EMSA                          |

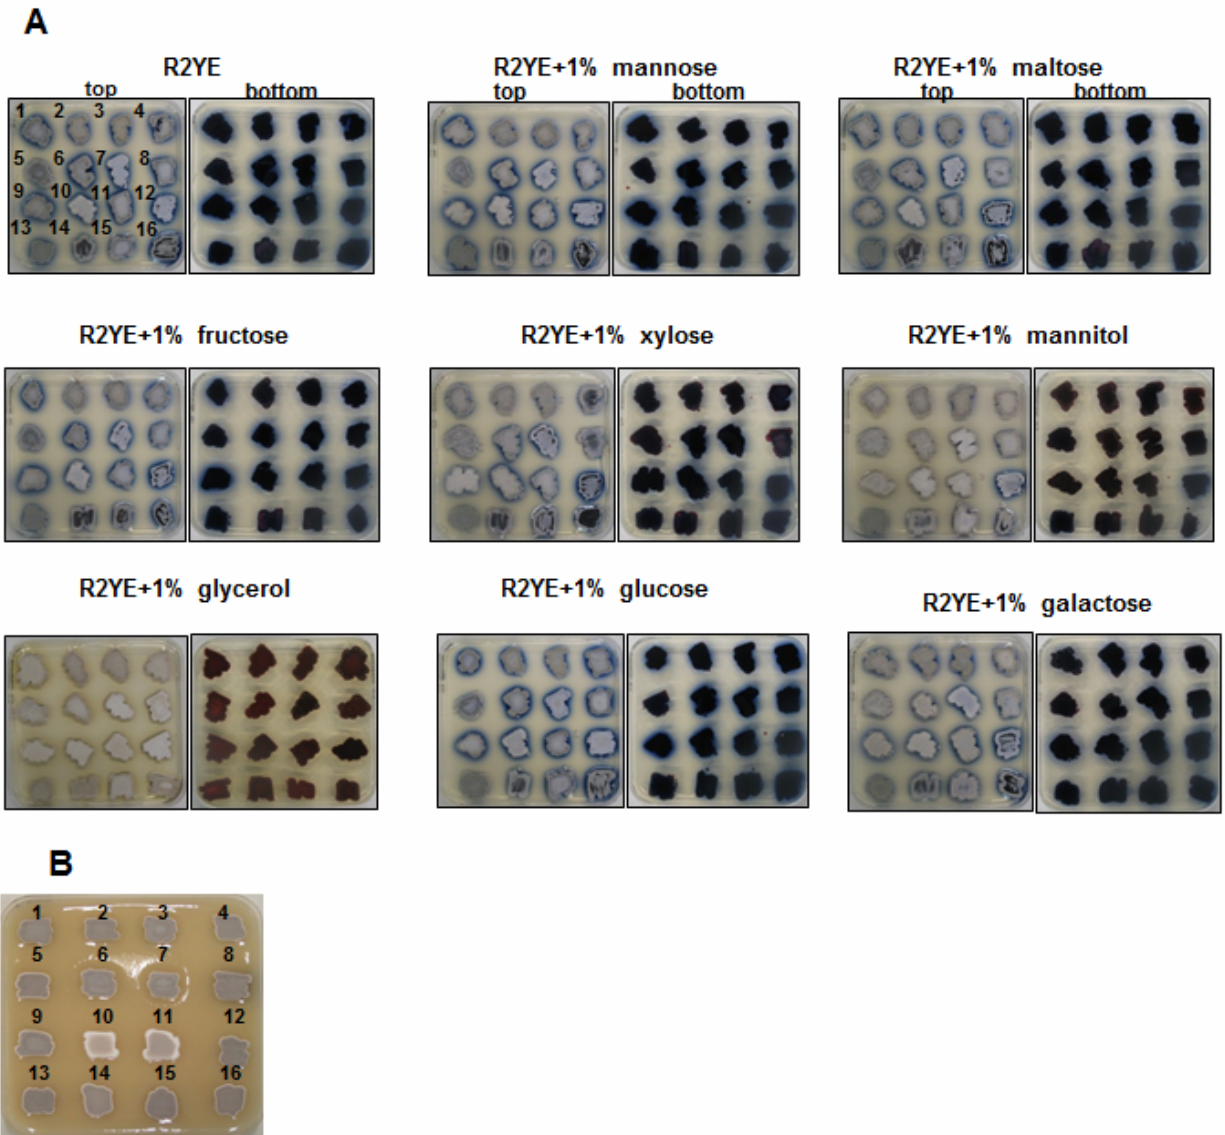

**Figure S1. Phenotypes of the *nag* mutants.** Strains were grown for four days on (A) R5- agar plates supplemented with 1% (w/v) of different carbon sources (glucose, fructose, galactose, glycerol, maltose, mannitol, mannose, or xylose) as indicated, or (B) on SFM agar plates. For each plate the top (left) and bottom (right) view is presented. Strains: 1. *S. coelicolor* M145 (parental strain), 2. GAM1 (M145 $\Delta$ *nagA*), 3. GAM4 (M145 $\Delta$ *nagA*<sup>IFD</sup>), 4. GAM4 + pHJL401/*nagA*, 5. M145  $\Delta$ *nagE2*, 6. GAM2 (M145 $\Delta$ *nagB*), 7. GAM5 (M145 $\Delta$ *nagB*<sup>IFD</sup>), 8. GAM5 + pHJL401/*nagB*, 9. GAM3 (M145 $\Delta$ *nagK*), 10. GAM6 (M145 $\Delta$ *nagK*<sup>IFD</sup>), 11. GAM6 + pHJL401/*nagKA*, 12. M145 $\Delta$ *nagA*<sup>IFD</sup> $\Delta$ *nagB*, 13. GAM9 (M145 $\Delta$ *nagB*<sup>IFD</sup> $\Delta$ *nagA*), 14. GAM8 (M145 $\Delta$ *nagKA*<sup>IFD</sup>), 15. M145 + pHJL401, 16. GAM10 (M145 $\Delta$ *nagKA*<sup>IFD</sup> $\Delta$ *nagB*). For strains see further Table 1 and the text. **IFD**, in-frame deletion mutant.

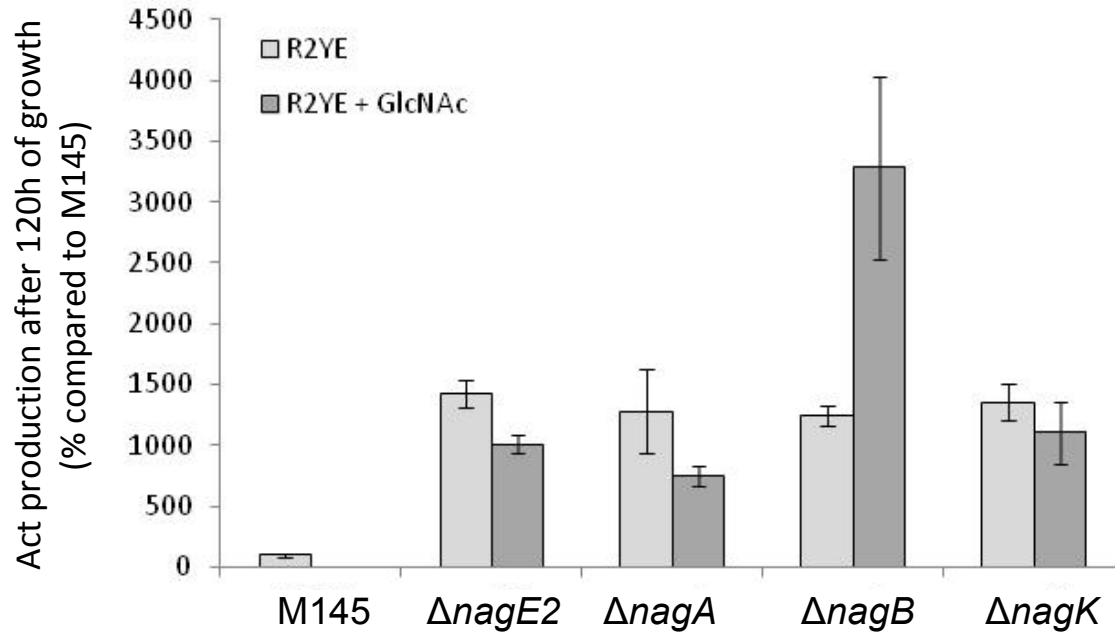

**Figure S2. Quantification of antibiotic production after 120 hr of growth.** Production of actinorhodin was quantified relative to the production by the parental strain *S. coelicolor* M145 (which was set to 100%). Cultures were grown for 120 hr on R2YE agar plates with (dark bars) or without (light bars) GlcNAc. For 42 hr and 48 hr see main text and Fig. 6.

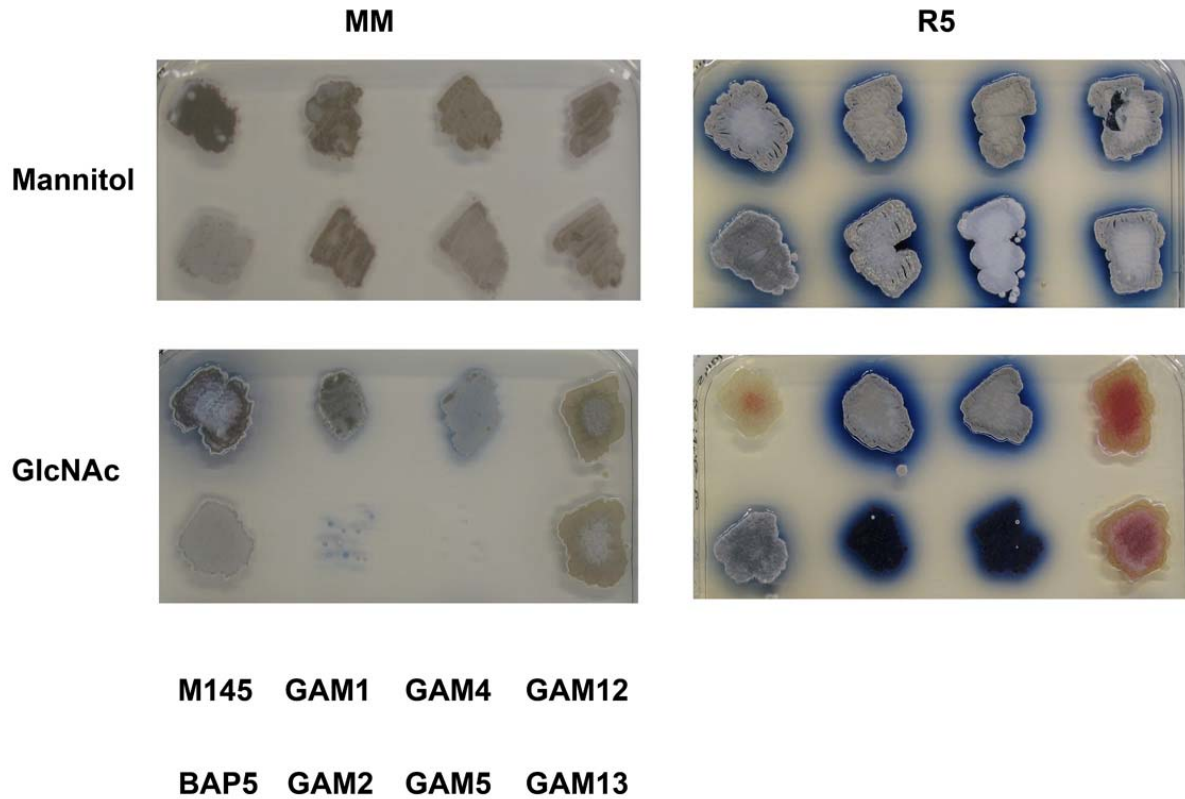

**Fig. S3. Complementation of the *nagA* and *nagB* mutants.** Left, patches of *S. coelicolor* M145 and derivatives on MM agar plates with either mannitol (top) or GlcNAc (bottom) as the sole carbon source. Right, idem but then on R5 agar plates. Note that complementation of *nagA* IFD mutant GAM4 with a plasmid harbouring the *nagKA* operon (strain GAM12) restores sensitivity to GlcNAc on R5, while complementation of *nagB* IFD mutant GAM5 with a plasmid harbouring the *nagB* gene (strain GAM13) restores normal growth and viability on MM and R5 with GlcNAc and normal GlcNAc sensing on R5. The *nagE2* mutant BAP5, which is insensitive to GlcNAc, was used as a control. Patches were grown for 4 days at 30°C.

## References

1. **Fedoryshyn, M., E. Welle, A. Bechthold, and A. Luzhetskyy.** 2008. Functional expression of the Cre recombinase in actinomycetes. *Appl Microbiol Biotechnol* **78**:1065-70.
2. **Larson, J. L., and C. L. Hershberger.** 1986. The minimal replicon of a streptomycete plasmid produces an ultrahigh level of plasmid DNA. *Plasmid* **15**:199-209.
3. **Vara, J., M. Lewandowska-Skarbek, Y. G. Wang, S. Donadio, and C. R. Hutchinson.** 1989. Cloning of genes governing the deoxysugar portion of the erythromycin biosynthesis pathway in *Saccharopolyspora erythraea* (*Streptomyces erythreus*). *J Bacteriol* **171**:5872-81.
